# Supplementary material for: Structure evolution and luminescence properties of lithium(i)–sulfonate complexes constructed from multifunctional arenedisulfonic acids
Source: Royal Society of Chemistry journal article supplement (doi:10.1039/c8ce00224j), 2018-01-01
Supplement: c8ce00224j1.pdf [file c8ce00224j1.pdf]

Electronic Supplementary Information for CrystEngComm

This journal is (c) The Royal Society of Chemistry 2018

Electronic Supplementary Information (ESI)

**Structure evolutions and luminescent properties of lithium(I)-  
sulfonate complexes constructed from multifunctional  
arenesulfonic acids**

Zhong-Yi Ge, Zhi-Biao Zhu, Zhao-Peng Deng,\*Li-Hua Huo and Shan Gao\*

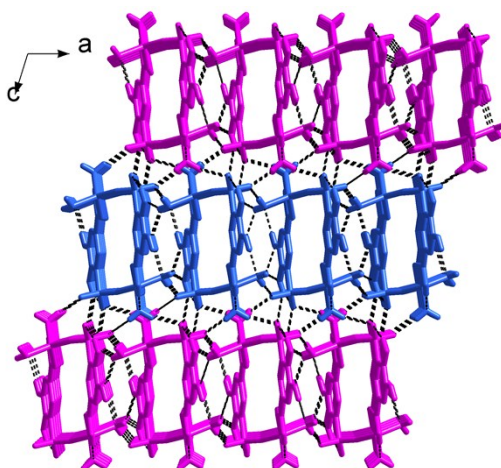

**Fig. S1** 3-D supramolecular network extended by the hydrogen-bonding interactions (black dashed lines).

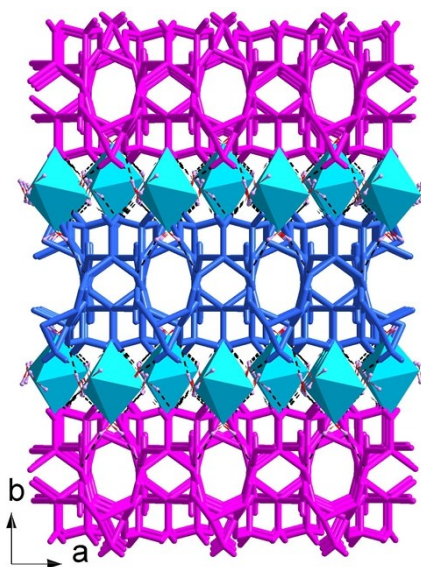

**Fig. S2** 3-D supramolecular network extended by the  $[\text{Li}_3(\text{H}_2\text{O})_5]^+$  cations through the hydrogen-bonding interactions (black dashed lines).

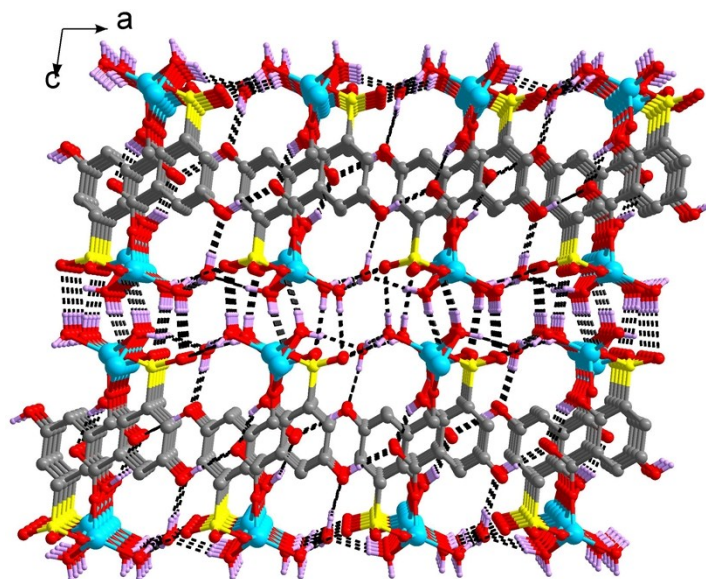

**Fig. S3** 3-D supramolecular network extended by the hydrogen-bonding interactions (black dashed lines).

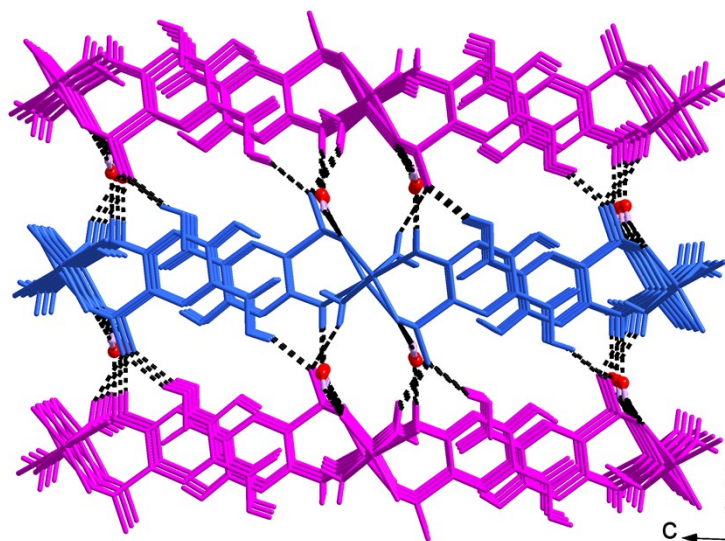

**Fig. S4** 3-D supramolecular network extended by the free water molecules (O2w) through the hydrogen-bonding interactions (black dashed lines).

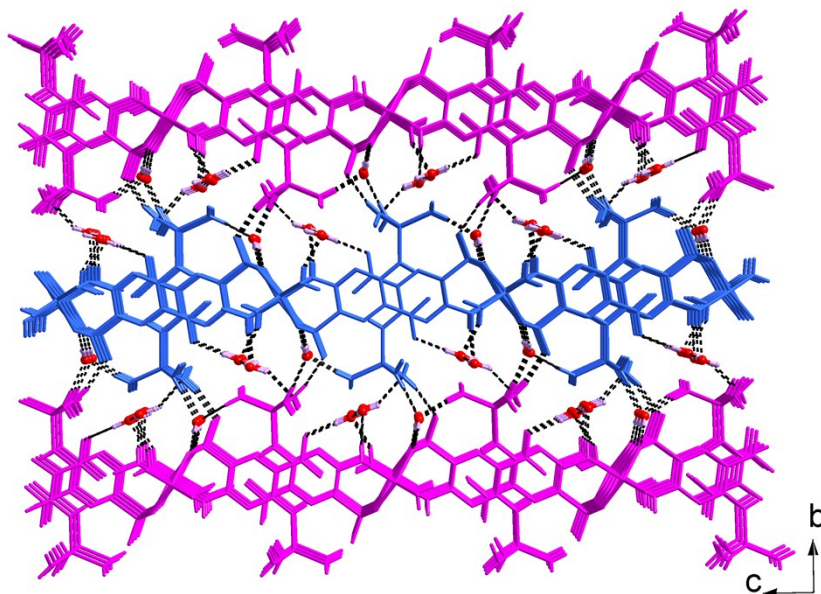

**Fig. S5** 3-D supramolecular network extended by the free water molecules through the hydrogen-bonding interactions (black dashed lines).

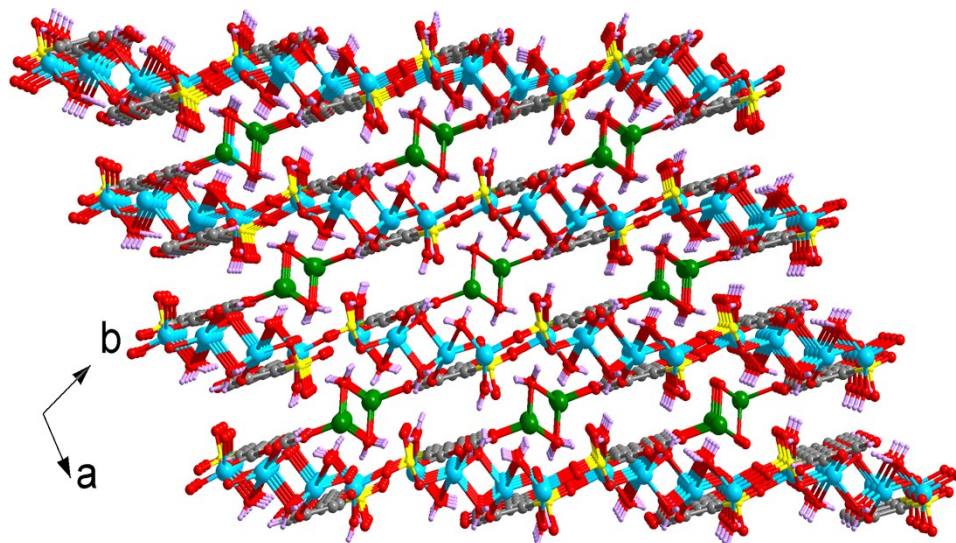

**Fig. S6** 3-D network of complex 8 with the Li<sub>3</sub> cations being denoted as green balls.

### **Powder X-ray diffraction (PXRD)**

Powder X-ray diffraction (PXRD) patterns for solid samples of complexes **1-8** were measured at room temperature as illustrated in Fig. S7. The patterns are highly similar to their simulated ones (based on the single-crystal X-ray diffraction data), indicating that the single-crystal structures are really representative of the bulk of the corresponding samples.

### **Thermogravimetric analysis**

To examine the thermal stability of the complexes, in this study, their stabilities were analyzed on crystalline samples by thermogravimetric analyses (TGA) from room temperature to 900 °C at a rate of 10 °C min<sup>-1</sup>, under N<sub>2</sub> atmosphere. As shown in Fig. S8, the TGA curve indicates that complex **1** loses the coordinated water molecules from 90 to 135 °C with the observed weight loss of 12.73% (calcd 13.05%). Then, one sharp step corresponding to the loss of the organic components occurs in the temperature range 135-710 °C. Complex **2** loses the free and coordinated water molecules from 85 to 164 °C with the observed weight loss of 18.94% (calcd 18.76%). The organic components are then removed progressively from 164 to 630 °C. The sharp weight loss in complex **3** between 50 and 160 °C corresponds to the removal of the free and coordinated water molecules (obsd 22.45%, calcd 22.65%). Then, the organic components are removed progressively from 245 to 480 °C. Complex **4** loses the free and coordinated water molecules from 76 to 122 °C with the observed weight loss of 9.88% (calcd 10.00%). The organic components are then removed progressively from 255 to 465 °C. The sharp weight loss in complex **5** between 86 and 150 °C corresponds to the removal of the free and coordinated water molecules (obsd 13.19%, calcd 13.05%). Then, the organic components are removed progressively from 150 to 775 °C. For complex **6**, the first sharp step between 60 and 170 °C corresponds to the release of free and coordinated water molecules with the observed weight loss of 33.38% (calcd 33.89%). Then, the following weight loss with the decomposing of organic components occurs in the temperature range 340-660 °C. Complex **7** loses the free and coordinated water molecules from 55 to 190 °C with the observed weight loss of 28.88% (calcd 28.71%). The organic components are then removed progressively from 190 to 623 °C. Complex **8** begins to lose the free and coordinated water molecules from 60 to 133 °C (obsd 17.88%, calcd 17.96%). The following gradually weight loss from 133 to 605 °C corresponds to the loss of the organic components.



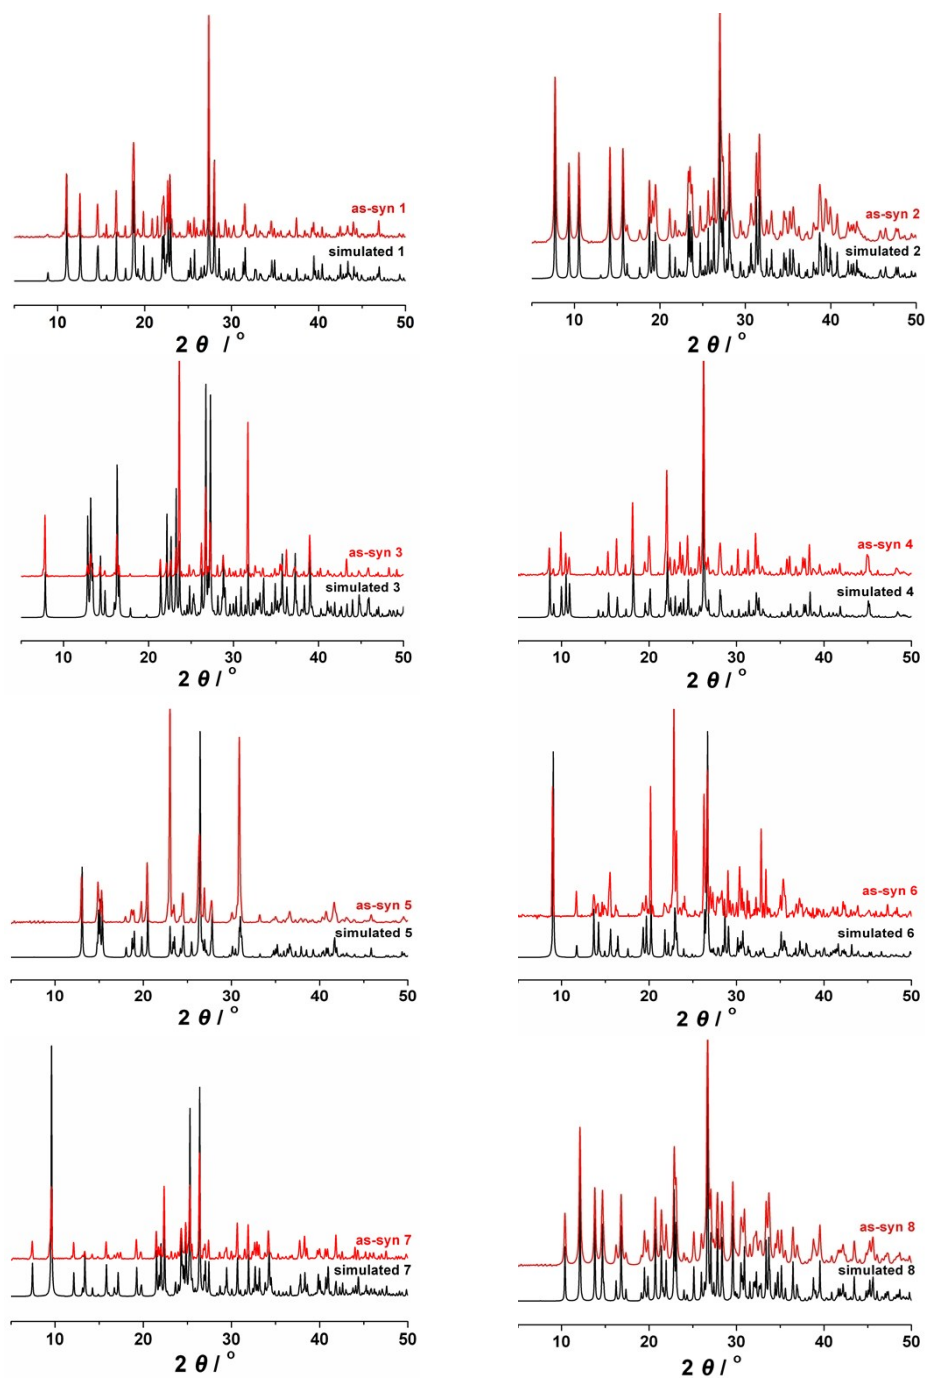

Fig. S7 PXRD patterns for complexes 1-8.

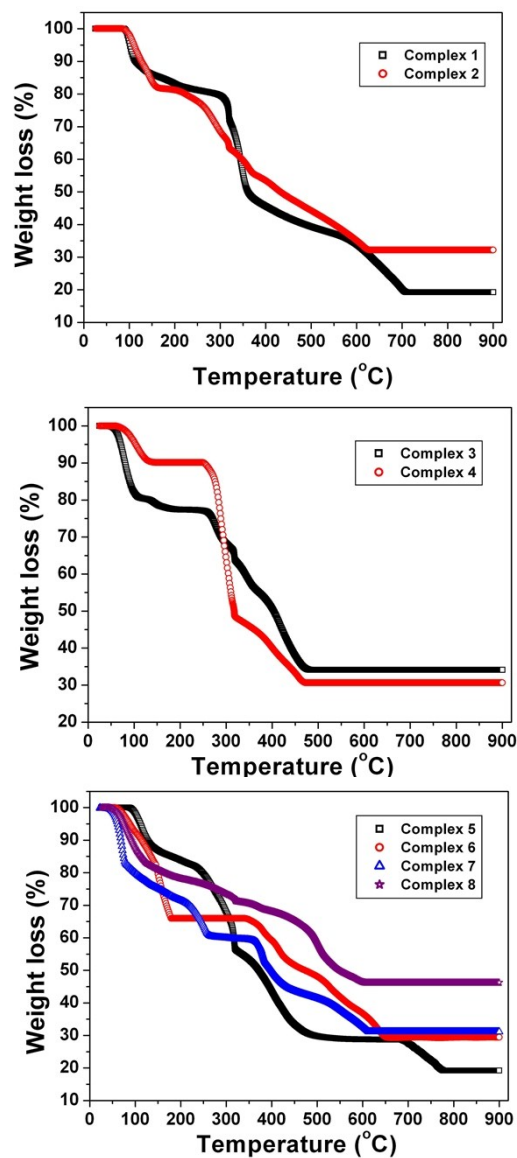

Fig. S8 TG curves of complexes 1-8.

**Table S1** Selected Bond Distances (Å) for Complexes **1-8**<sup>a</sup>

| Complex 1                 |           |                           |           |
|---------------------------|-----------|---------------------------|-----------|
| Li(1)-O(1) <sup>i</sup>   | 1.867(5)  | Li(1)-O(6)                | 1.954(5)  |
| Li(1)-O(1W)               | 1.949(5)  | Li(1)-O(2W)               | 1.986(5)  |
| Complex 2                 |           |                           |           |
| Li(1)-O(3) <sup>i</sup>   | 2.010(8)  | Li(2)-O(5) <sup>i</sup>   | 2.608(3)  |
| Li(1)-O(1W)               | 2.015(8)  | Li(2)-O(5) <sup>iv</sup>  | 2.608(3)  |
| Li(1)-O(4) <sup>i</sup>   | 2.033(8)  | Li(3)-O(5W) <sup>ii</sup> | 2.106(3)  |
| Li(1)-O(6)                | 2.054(9)  | Li(3)-O(5W)               | 2.106(3)  |
| Li(1)-O(6) <sup>ii</sup>  | 2.192(12) | Li(3)-O(4W)               | 2.143(16) |
| Li(1)-Li(1) <sup>ii</sup> | 2.575(2)  | Li(3)-O(3W)               | 2.150(6)  |
| Li(2)-O(2W)               | 1.900(13) | Li(3)-O(3W) <sup>ii</sup> | 2.150(6)  |
| Li(2)-O(7) <sup>iii</sup> | 1.905(7)  | Li(2)-O(7)                | 1.905(7)  |
| Complex 3                 |           |                           |           |
| Li(1)-O(6)                | 1.905(12) | Li(2)-O(3)                | 2.016(11) |
| Li(1)-O(1) <sup>i</sup>   | 1.917(12) | Li(2)-O(6) <sup>ii</sup>  | 2.095(11) |
| Li(1)-O(2W)               | 1.950(11) | Li(2)-O(4)                | 2.105(10) |
| Li(1)-O(1W)               | 1.980(12) | Li(2)-O(2W) <sup>ii</sup> | 2.176(10) |
| Li(1)-Li(2) <sup>ii</sup> | 2.769(2)  | Li(2)-Li(1) <sup>ii</sup> | 2.769(2)  |
| Li(2)-O(3W)               | 1.949(12) |                           |           |
| Complex 4                 |           |                           |           |
| Li(1)-O(1W)               | 1.921(11) | Li(2)-O(3)                | 2.048(10) |
| Li(1)-O(9)                | 1.940(11) | Li(2)-O(10) <sup>ii</sup> | 2.094(10) |
| Li(1)-O(7) <sup>i</sup>   | 2.009(10) | Li(2)-Li(2) <sup>ii</sup> | 3.025(19) |



|                           |           |                           |           |
|---------------------------|-----------|---------------------------|-----------|
| Li(1)-O(3)                | 2.032(10) | Li(3)-O(2W)               | 1.884(11) |
| Li(1)-Li(2)               | 3.367(12) | Li(3)-O(1)                | 1.923(10) |
| Li(2)-O(10)               | 1.964(10) | Li(3)-O(6) <sup>iii</sup> | 1.980(11) |
| Li(2)-O(4)                | 1.991(10) | Li(3)-O(13) <sup>iv</sup> | 1.997(10) |
| Li(2)-O(11) <sup>ii</sup> | 2.040(11) |                           |           |

---

**Complex 5**

|                           |          |                           |          |
|---------------------------|----------|---------------------------|----------|
| Li(1)-O(2) <sup>i</sup>   | 1.966(6) | Li(1)-O(1W)               | 2.102(7) |
| Li(1)-O(1)                | 1.983(6) | Li(1)-O(4)                | 2.459(7) |
| Li(1)-O(1W) <sup>ii</sup> | 2.062(6) | Li(1)-Li(1) <sup>ii</sup> | 3.115(1) |

---

**Complex 6**

|                           |          |                           |          |
|---------------------------|----------|---------------------------|----------|
| Li(1)-O(3)                | 1.962(7) | Li(1)-Li(1) <sup>ii</sup> | 3.064(1) |
| Li(1)-O(2) <sup>i</sup>   | 1.970(7) | Li(2)-O(4W)               | 1.881(6) |
| Li(1)-O(1W) <sup>ii</sup> | 2.074(8) | Li(2)-O(2W)               | 1.908(7) |
| Li(1)-O(1W)               | 2.084(7) | Li(2)-O(5)                | 1.946(6) |
| Li(1)-O(4)                | 2.463(7) | Li(2)-O(3W)               | 1.966(7) |

---

**Complex 7**

|                            |          |                            |          |
|----------------------------|----------|----------------------------|----------|
| Li(1)-O(4)                 | 1.928(7) | Li(2)-O(2) <sup>iii</sup>  | 2.021(6) |
| Li(1)-O(3) <sup>i</sup>    | 1.947(7) | Li(2)-O(2W)                | 2.096(7) |
| Li(1)-O(1W)                | 2.005(7) | Li(2)-O(3W)                | 2.102(7) |
| Li(1)-O(6) <sup>ii</sup>   | 2.092(7) | Li(2)-O(1W) <sup>iii</sup> | 2.181(7) |
| Li(1)-O(2)                 | 2.219(7) | Li(2)-Li(1) <sup>iii</sup> | 3.116(9) |
| Li(1)-Li(2) <sup>iii</sup> | 3.116(9) | Li(2)-Li(2) <sup>iii</sup> | 3.490(9) |
| Li(2)-O(1)                 | 1.982(7) |                            |          |

---

**Complex 8**

|             |          |                           |          |
|-------------|----------|---------------------------|----------|
| Li(1)-O(3)  | 2.029(6) | Li(2)-O(3W)               | 1.960(6) |
| Li(1)-O(4)  | 2.041(6) | Li(2)-O(7)                | 1.974(5) |
| Li(1)-O(1W) | 2.074(6) | Li(2)-Li(1) <sup>iv</sup> | 3.227(8) |

|                           |           |                          |           |
|---------------------------|-----------|--------------------------|-----------|
| Li(1)-O(1W) <sup>i</sup>  | 2.078(6)  | Li(3)-O(5W)              | 1.887(9)  |
| Li(1)-O(3W) <sup>ii</sup> | 2.349(6)  | Li(3)-O(5)               | 1.935(6)  |
| Li(1)-Li(1) <sup>i</sup>  | 2.855(10) | Li(3)-O(4W)              | 2.040(7)  |
| Li(1)-Li(2) <sup>ii</sup> | 3.227(8)  | Li(3)-O(4W) <sup>v</sup> | 2.047(7)  |
| Li(2)-O(2W)               | 1.906(6)  | Li(3)-Li(3) <sup>v</sup> | 2.855(13) |
| Li(2)-O(2) <sup>iii</sup> | 1.906(5)  |                          |           |

---

<sup>a</sup> Symmetry transformations used to generate equivalent atoms: (i)  $-x+2,-y+2,-z+1$  for **1**; (i)  $x,-y+1,z-1/2$ ; (ii)  $-x,y,-z+1/2$ ; (iii)  $-x+1,y,-z+1/2$ ; (iv)  $-x+1,-y+1,-z+1$  for **2**; (i)  $-x+2,-y+1,-z+1$ ; (ii)  $-x+2,-y,-z+1$  for **3**; (i)  $-x,-y,-z+1$ ; (ii)  $-x+1,-y+1,-z+1$ ; (iii)  $-x+1,-y,-z+1$ ; (iv)  $x-1,y-1,z-1$  for **4**; (i)  $-x+1,-y+1,-z$ ; (ii)  $-x+2,-y+1,-z$  for **5**; (i)  $-x,-y+1,-z$ ; (ii)  $-x-1,-y+1,-z$  for **6**; (i)  $-x+2,y,-z+3/2$ ; (ii)  $x+1/2,-y+1/2,z+1/2$ ; (iii)  $-x+1,y,-z+3/2$  for **7**; (i)  $-x+1,-y+2,-z$ ; (ii)  $x,y,z-1$ ; (iii)  $-x,-y+1,-z+1$ ; (iv)  $x,y,z+1$ ; (v)  $-x+1,-y+3,-z+1$  for **8**.

---

**Table S2** Selected Hydrogen Bond Parameters for Complexes **1-8**<sup>a</sup>

| D-H...A                             | d(D-H)  | d(H...A)  | d(D...A) | <(DHA)    |
|-------------------------------------|---------|-----------|----------|-----------|
| <b>Complex 1</b>                    |         |           |          |           |
| O(1W)-H(1W1)...O(2) <sup>ii</sup>   | 0.85(3) | 1.949(11) | 2.784(3) | 169(3)    |
| O(1W)-H(1W2)...O(5) <sup>iii</sup>  | 0.85(3) | 2.22(2)   | 2.970(3) | 148(3)    |
| O(1W)-H(1W2)...O(4) <sup>iii</sup>  | 0.85(3) | 2.24(2)   | 2.895(3) | 134(3)    |
| O(2W)-H(2W1)...O(2) <sup>iv</sup>   | 0.85(3) | 1.935(11) | 2.781(3) | 172(3)    |
| O(2W)-H(2W2)...O(3) <sup>v</sup>    | 0.85(3) | 2.102(11) | 2.927(3) | 165(3)    |
| O(4)-H(4O)...O(1W) <sup>vi</sup>    | 0.82    | 2.03      | 2.846(3) | 176.7     |
| O(5)-H(5O)...O(3)                   | 0.82    | 1.94      | 2.674(3) | 149.2     |
| O(5)-H(5O)...O(3) <sup>vii</sup>    | 0.82    | 2.47      | 2.996(3) | 123.3     |
| O(7)-H(7O)...O(2W)                  | 0.82    | 1.87      | 2.686(3) | 170.0     |
| <b>Complex 2</b>                    |         |           |          |           |
| O(1W)-H(1W1)...O(3W) <sup>vi</sup>  | 0.85(4) | 1.970(7)  | 2.820(4) | 175.9(14) |
| O(2W)-H(2W1)...O(5W)                | 0.85(4) | 2.020(14) | 2.858(4) | 168(5)    |
| O(3W)-H(3W2)...O(7W) <sup>i</sup>   | 0.85(4) | 2.005(19) | 2.825(4) | 161(4)    |
| O(3W)-H(3W1)...O(1) <sup>vii</sup>  | 0.85(4) | 1.980(17) | 2.814(4) | 165(5)    |
| O(4)-H(4O)...O(7) <sup>v</sup>      | 0.82    | 1.89      | 2.647(4) | 152.3     |
| O(4)-H(4O)...O(5)                   | 0.82    | 2.25      | 2.690(4) | 114.2     |
| O(4W)-H(4W1)...O(7)                 | 0.85(5) | 2.47(3)   | 3.196(5) | 144(4)    |
| O(5W)-H(5W2)...O(3) <sup>viii</sup> | 0.85(4) | 2.20(2)   | 3.009(4) | 158(4)    |
| O(5W)-H(5W2)...O(1W) <sup>ix</sup>  | 0.85(4) | 2.53(3)   | 3.117(4) | 127(4)    |
| O(5W)-H(5W1)...O(2)                 | 0.86(4) | 1.869(19) | 2.693(4) | 161(5)    |
| O(5)-H(5O)...O(7W)                  | 0.82    | 1.93      | 2.752(4) | 179.9     |
| O(6W)-H(6W1)...O(6) <sup>iii</sup>  | 0.85(4) | 2.29(4)   | 2.988(4) | 140(5)    |
| O(7W)-H(7W2)...O(1) <sup>iv</sup>   | 0.85(4) | 1.981(13) | 2.827(4) | 173(4)    |
| O(7W)-H(7W1)...O(2) <sup>x</sup>    | 0.85(4) | 2.20(3)   | 2.868(5) | 136(4)    |
| <b>Complex 3</b>                    |         |           |          |           |
| O(4)-H(4O)...O(5)                   | 0.82    | 1.77      | 2.504(5) | 147.4     |
| O(7)-H(7O)...O(5) <sup>iii</sup>    | 0.82    | 1.81      | 2.633(5) | 175.8     |
| O(3W)-H(3W1)...O(3) <sup>iv</sup>   | 0.85(6) | 2.092(13) | 2.939(6) | 174(6)    |
| O(2W)-H(2W2)...O(4W) <sup>v</sup>   | 0.85(6) | 1.921(15) | 2.762(7) | 170(6)    |

|                                      |         |           |          |        |
|--------------------------------------|---------|-----------|----------|--------|
| O(4W)-H(4W2)...O(7) <sup>i</sup>     | 0.85(6) | 1.94(2)   | 2.774(6) | 165(7) |
| O(2W)-H(2W1)...O(1) <sup>vi</sup>    | 0.85(6) | 1.98(2)   | 2.792(6) | 161(6) |
| O(3W)-H(3W2)...O(4W)                 | 0.85(6) | 1.984(14) | 2.832(7) | 175(7) |
| O(4W)-H(4W1)...O(1W) <sup>i</sup>    | 0.85(6) | 2.15(2)   | 2.993(7) | 169(8) |
| O(1W)-H(1W2)...O(2) <sup>vi</sup>    | 0.85(6) | 2.163(14) | 3.012(6) | 175(6) |
| O(1W)-H(1W1)...O(2) <sup>vii</sup>   | 0.85(6) | 2.09(2)   | 2.912(7) | 164(6) |
| <b>Complex 4</b>                     |         |           |          |        |
| O(1W)-H(1W1)...O(5) <sup>ii</sup>    | 0.85(6) | 1.97(2)   | 2.809(6) | 166(7) |
| O(1W)-H(1W2)...O(8) <sup>vi</sup>    | 0.85(6) | 1.891(17) | 2.731(5) | 169(6) |
| O(2W)-H(2W1)...O(1W) <sup>vii</sup>  | 0.85    | 2.04      | 2.866(6) | 165.7  |
| O(2W)-H(2W2)...O(3W) <sup>viii</sup> | 0.85    | 2.40      | 2.987(7) | 126.2  |
| O(3W)-H(3W1)...O(14) <sup>ix</sup>   | 0.85(6) | 2.20(3)   | 3.001(6) | 157(7) |
| O(3W)-H(3W2)...O(1) <sup>iii</sup>   | 0.85(6) | 2.233(18) | 3.080(6) | 171(7) |
| O(4)-H(4O)...O(5)                    | 0.82    | 1.77      | 2.498(5) | 147.7  |
| O(7)-H(7O)...O(3W)                   | 0.82    | 1.90      | 2.720(6) | 179.3  |
| O(11)-H(11O)...O(13)                 | 0.82    | 1.87      | 2.585(5) | 145.7  |
| O(12)-H(12O)...O(6) <sup>x</sup>     | 0.82    | 1.72      | 2.535(5) | 173.5  |
| O(14)-H(14O)...O(2) <sup>i</sup>     | 0.82    | 1.93      | 2.743(5) | 170.9  |
| <b>Complex 5</b>                     |         |           |          |        |
| O(1W)-H(1W1)...O(3) <sup>iii</sup>   | 0.85    | 2.12      | 2.903(3) | 153.0  |
| O(1W)-H(1W2)...O(6) <sup>iv</sup>    | 0.85    | 1.87      | 2.707(4) | 168.5  |
| O(2W)-H(2W1)...O(2) <sup>v</sup>     | 0.85    | 2.00      | 2.828(4) | 163.7  |
| O(2W)-H(2W2)...O(1)                  | 0.86    | 1.96      | 2.794(3) | 165.4  |
| O(4)-H(4O)...O(2W) <sup>vi</sup>     | 0.82    | 1.77      | 2.591(4) | 179.1  |
| O(5)-H(5O)...O(6)                    | 0.82    | 1.91      | 2.626(4) | 146.2  |
| O(7)-H(7O)...O(3) <sup>vii</sup>     | 0.82    | 1.99      | 2.775(4) | 159.5  |
| <b>Complex 6</b>                     |         |           |          |        |
| O(1W)-H(1W1)...O(7W) <sup>iii</sup>  | 0.85(3) | 1.978(18) | 2.774(3) | 155(3) |
| O(1W)-H(1W2)...O(6) <sup>iv</sup>    | 0.85(3) | 1.988(16) | 2.806(3) | 160(3) |
| O(2W)-H(2W1)...O(5W) <sup>v</sup>    | 0.85(3) | 1.842(12) | 2.688(4) | 174(4) |
| O(2W)-H(2W2)...O(6W)                 | 0.85(3) | 1.982(15) | 2.774(4) | 155(3) |
| O(3W)-H(3W1)...O(7) <sup>iv</sup>    | 0.85(3) | 1.938(11) | 2.789(4) | 179(4) |
| O(3W)-H(3W2)...O(1) <sup>vi</sup>    | 0.86(3) | 1.953(12) | 2.787(3) | 165(3) |
| O(4W)-H(4W1)...O(5W)                 | 0.85(3) | 1.887(13) | 2.728(4) | 169(4) |
| O(4W)-H(4W2)...O(7) <sup>vii</sup>   | 0.85(3) | 1.960(14) | 2.795(4) | 169(5) |

|                                     |         |           |          |        |
|-------------------------------------|---------|-----------|----------|--------|
| O(4)-H(4O)...O(6W) <sup>iii</sup>   | 0.82    | 1.91      | 2.727(3) | 176.2  |
| O(5)-H(5O)...O(6)                   | 0.82    | 1.72      | 2.459(3) | 148.8  |
| O(5W)-H(5W1)...O(2) <sup>viii</sup> | 0.86(3) | 1.878(12) | 2.730(3) | 173(3) |
| O(5W)-H(5W2)...O(3) <sup>vi</sup>   | 0.85(3) | 1.909(11) | 2.756(3) | 175(4) |
| O(6W)-H(6W1)...O(3W)                | 0.85    | 2.26      | 2.943(4) | 136.9  |
| O(6W)-H(6W2)...O(7W)                | 0.85    | 1.88      | 2.729(4) | 178.9  |
| O(7W)-H(7W2)...O(4W) <sup>ix</sup>  | 0.85    | 2.94      | 3.296(4) | 107.1  |
| O(7W)-H(7W1)...O(7) <sup>x</sup>    | 0.85    | 1.86      | 2.707(3) | 177.1  |
| Complex 7                           |         |           |          |        |
| O(1W)-H(1W2)...O(5W) <sup>v</sup>   | 0.85(4) | 2.013(17) | 2.830(4) | 161(3) |
| O(1W)-H(1W1)...O(6W) <sup>vi</sup>  | 0.85(4) | 2.020(13) | 2.868(4) | 172(4) |
| O(2W)-H(2W)...O(4W) <sup>iii</sup>  | 0.85(4) | 1.903(9)  | 2.754(3) | 176(4) |
| O(3W)-H(3W1)...O(5W)                | 0.85(4) | 1.97(3)   | 2.751(4) | 151(4) |
| O(3W)-H(3W2)...O(1) <sup>vii</sup>  | 0.85(4) | 2.13(2)   | 2.897(3) | 150(4) |
| O(4)-H(4O)...O(7) <sup>ii</sup>     | 0.82    | 1.75      | 2.548(3) | 165.0  |
| O(4W)-H(4W2)...O(5) <sup>viii</sup> | 0.85(4) | 1.914(11) | 2.757(4) | 173(4) |
| O(4W)-H(4W1)...O(6W) <sup>ix</sup>  | 0.85(4) | 1.927(14) | 2.754(4) | 164(4) |
| O(5)-H(5O)...O(6)                   | 0.82    | 1.73      | 2.466(4) | 148.8  |
| O(5W)-H(5W1)...O(7) <sup>vii</sup>  | 0.85(4) | 1.844(14) | 2.685(4) | 169(5) |
| O(5W)-H(5W2)...O(4W) <sup>iii</sup> | 0.85(4) | 1.884(14) | 2.721(4) | 167(5) |
| O(6W)-H(6W1)...O(3) <sup>x</sup>    | 0.85(4) | 2.057(15) | 2.892(4) | 168(5) |
| O(6W)-H(6W2)...O(3W)                | 0.85(4) | 2.000(11) | 2.850(4) | 177(4) |
| Complex 8                           |         |           |          |        |
| O(1W)-H(1W1)...O(1) <sup>vi</sup>   | 0.86(3) | 2.024(15) | 2.849(3) | 162(3) |
| O(1W)-H(1W2)...O(6) <sup>ii</sup>   | 0.86(3) | 1.887(12) | 2.738(3) | 171(3) |
| O(2W)-H(2W1)...O(1) <sup>iv</sup>   | 0.85(4) | 1.99(4)   | 2.828(4) | 165(5) |
| O(2W)-H(2W2)...O(4) <sup>vii</sup>  | 0.85(4) | 1.85(6)   | 2.704(3) | 176(5) |
| O(3W)-H(3W1)...O(4) <sup>viii</sup> | 0.85(4) | 1.879(17) | 2.703(3) | 163(4) |
| O(3W)-H(3W2)...O(6W)                | 0.85(4) | 2.18(2)   | 2.964(2) | 154(4) |
| O(4W)-H(4W1)...O(7) <sup>ix</sup>   | 0.85(4) | 2.00(3)   | 2.842(3) | 174(3) |
| O(4W)-H(4W2)...O(7) <sup>vii</sup>  | 0.85(4) | 2.040(16) | 2.861(3) | 164(3) |
| O(5)-H(5O)...O(6)                   | 0.82    | 1.77      | 2.511(3) | 148.8  |
| O(5W)-H(5W1)...O(3) <sup>viii</sup> | 0.85    | 2.32      | 3.082(5) | 149.3  |
| O(5W)-H(5W2)...O(6W) <sup>ix</sup>  | 0.85    | 2.23      | 2.992(5) | 149.3  |
| O(6W)-H(6W1)...O(1) <sup>iii</sup>  | 0.85    | 1.87      | 2.715(3) | 171.1  |

|                                  |      |      |          |       |
|----------------------------------|------|------|----------|-------|
| O(6W)-H(6W2)...O(3) <sup>x</sup> | 0.85 | 2.31 | 3.156(2) | 171.6 |
|----------------------------------|------|------|----------|-------|

<sup>a</sup> Symmetry transformations used to generate equivalent atoms: (ii)  $-x+1,-y+2,-z+1$ ; (iii)  $-x+1,-y+1,-z+1$ ; (iv)  $x,y,z-1$ ; (v)  $x-1,y,z-1$ ; (vi)  $x,y-1,z$ ; (vii)  $-x+2,-y+1,-z+2$  for **1**; (i)  $x,-y+1,z-1/2$ ; (iii)  $-x+1,y,-z+1/2$ ; (iv)  $-x+1,-y+1,-z+1$ ; (v)  $x,-y+1,z+1/2$ ; (vi)  $x-1/2,y+1/2,z$ ; (vii)  $x-1/2,-y+1/2,z-1/2$ ; (viii)  $-x+1/2,-y+1/2,-z+1$ ; (ix)  $x+1/2,y-1/2,z$ ; (x)  $-x,-y+1,-z+1$  for **2**; (i)  $-x+2,-y+1,-z+1$ ; (iii)  $x+1,y+1,z$ ; (iv)  $-x+2,-y,-z$ ; (v)  $-x+1,-y,-z+1$ ; (vi)  $x,y,z+1$ ; (vii)  $-x+3,-y+1,-z+1$  for **3**; (i)  $-x,-y,-z+1$ ; (ii)  $-x+1,-y+1,-z+1$ ; (iii)  $-x+1,-y,-z+1$ ; (vi)  $-x,-y+1,-z+1$ ; (vii)  $-x,-y,-z$ ; (viii)  $x,y,z-1$ ; (ix)  $-x+1,-y,-z+2$ ; (x)  $-x+2,-y+1,-z+2$  for **4**; (iii)  $-x+1,-y+2,-z$ ; (iv)  $x+1,y,z-1$ ; (v)  $x+1,y,z$ ; (vi)  $x,y-1,z$ ; (vii)  $-x,-y+2,-z+1$  for **5**; (iii)  $x,-y+1/2,z-1/2$ ; (iv)  $-x,-y+1,-z+1$ ; (v)  $x,-y+1/2,z+1/2$ ; (vi)  $-x,y-1/2,-z+1/2$ ; (vii)  $-x+1,-y+1,-z+1$ ; (viii)  $-x+1,y-1/2,-z+1/2$ ; (ix)  $x-1,y,z$ ; (x)  $-x,y-1/2,-z+3/2$  for **6**; (ii)  $x+1/2,-y+1/2,z+1/2$ ; (iii)  $-x+1,y,-z+3/2$ ; (v)  $x,-y+1,z+1/2$ ; (vi)  $x+1,-y+1,z+1/2$ ; (vii)  $-x+1,-y+1,-z+1$ ; (viii)  $x-1/2,y+1/2,z$ ; (ix)  $-x,y,-z+3/2$ ; (x)  $x-1,y,z$  for **7**; (ii)  $x,y,z-1$ ; (iii)  $-x,-y+1,-z+1$ ; (iv)  $x,y,z+1$ ; (vi)  $-x,-y+2,-z$ ; (vii)  $-x,-y+2,-z+1$ ; (viii)  $-x+1,-y+2,-z+1$ ; (ix)  $x,y+1,z$ ; (x)  $-x+1,-y+1,-z+1$  for **8**.
